# Supplementary material
Source: Springer Nature journal article supplement (https://www.springermedizin.de/resource/supplementary/13550_2012_71_MOESM5_ESM.pdf/9687552)

**Supplementary Figure 8. Contrast recovery in function of the number of iterations for General Electric Infinia Hawkeye 4.** Reconstructions were performed with General Electric Evolution for Bone including attenuation and scatter correction and resolution recovery and eight subsets. (A, B) Hot rods. (C, D) Cold rods. (A, C) Full ROI. (B, D) Half ROI.

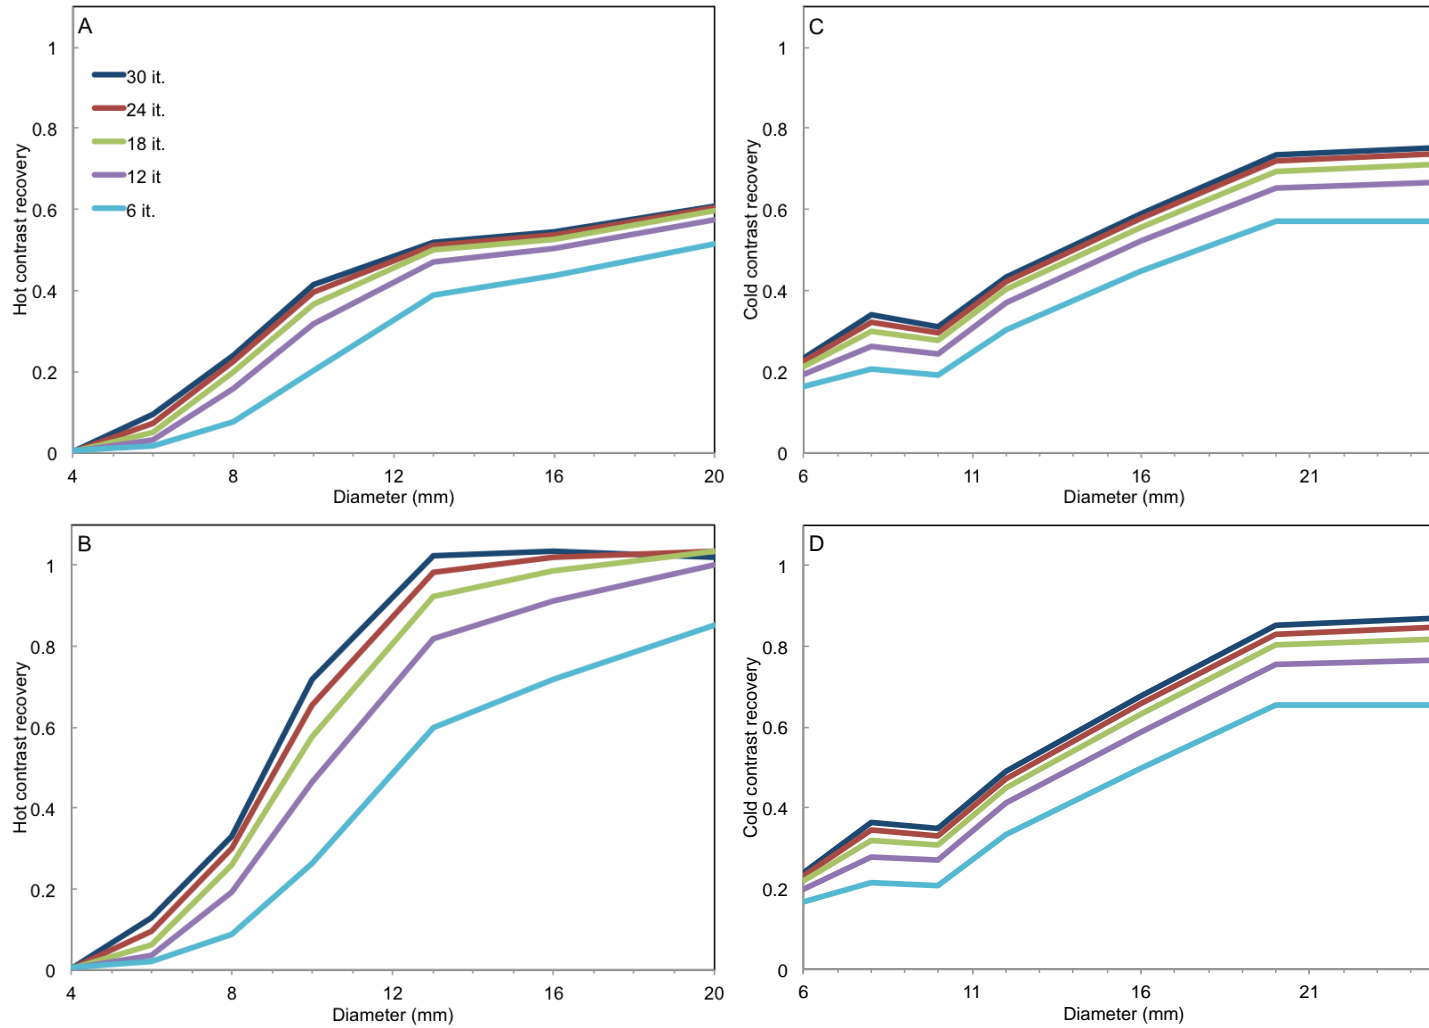

Supplement: MOESM5 [file 9687552]
